# Supplementary material for: Microstructures, thermophysical properties and thermal cycling behavior of LaZnAl11O19 thermal barrier coatings deposited by atmospheric plasma spraying
Source: Royal Society of Chemistry journal article supplement (doi:10.1039/c9qi01104h), 2019-01-01
Supplement: c9qi01104h1.pdf [file c9qi01104h1.pdf]

## Supporting Information

### Microstructures, thermophysical properties and thermal cycling behavior of $\text{LaZnAl}_{11}\text{O}_{19}$ thermal barrier coatings deposited by atmospheric plasma spraying

Fan Liu<sup>a,1</sup>, Wenjia Song<sup>b,1</sup>, Xin Zhou<sup>a,b,\*</sup>, Panjie Huo<sup>a</sup>, Jieyan Yuan<sup>a</sup>, Jianing Jiang<sup>a</sup>, Longhui Deng<sup>a</sup>,  
Shujuan Dong<sup>a</sup>, Xueqiang Cao<sup>a,\*</sup>

<sup>a</sup> State Key Laboratory of Silicate Materials for Architectures, Wuhan University of Technology, Wuhan 430070, China

<sup>b</sup> Department of Earth and Environmental Sciences, Ludwig-Maximilians-Universität (LMU) München, Theresienstrasse 41/III, Munich 80333, Germany

E-mail addresses: [zhouxin1@whut.edu.cn](mailto:zhouxin1@whut.edu.cn) (X. Zhou) Tel.: +86 18163313479.

E-mail addresses: [xcao@whut.edu.cn](mailto:xcao@whut.edu.cn) (X. Cao) Tel.: +86 13664438138.

---

\*E-mail addresses: [zhouxin1@whut.edu.cn](mailto:zhouxin1@whut.edu.cn) (X. Zhou) Tel.: +86 18163313479.

\*E-mail addresses: [xcao@whut.edu.cn](mailto:xcao@whut.edu.cn) (X. Cao) Tel.: +86 13664438138.

<sup>1</sup>These authors contributed equally to this work.

| Supporting information | Page in paper      |
|------------------------|--------------------|
| Table S1               | Line 3 on page 6   |
| Fig. S1                | Line 19 on page 14 |
| Fig. S2                | Line 4 on page 18  |
| Fig. S3                | Line 6 on page 23  |

**Table S1** The thicknesses of bond coat and ceramic coat in TBCs

| TBCs        | Thickness of bond coat (um) | Thickness of LZA coating (um) | Thickness of YSZ coating (um) |
|-------------|-----------------------------|-------------------------------|-------------------------------|
| LZA TBC     | ~146                        | ~249                          | –                             |
| LZA/YSZ TBC | ~140                        | ~154                          | ~210                          |

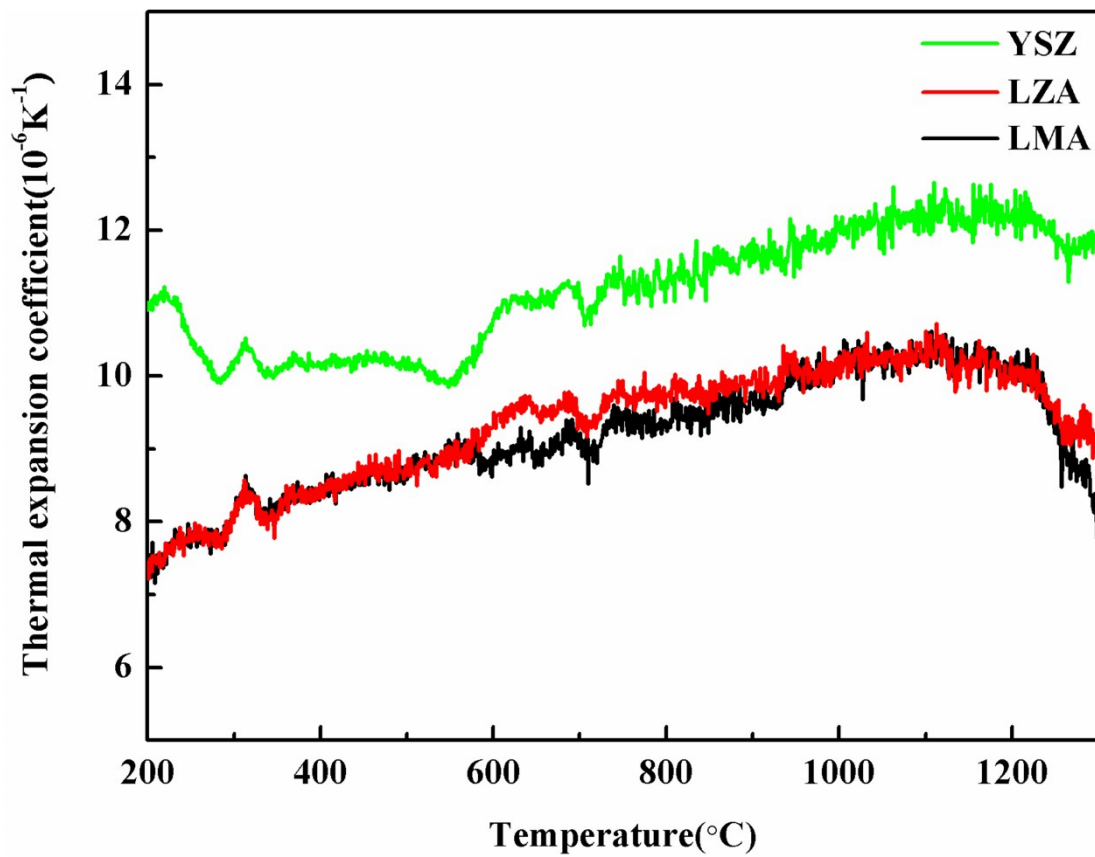

Fig. S1. The thermal expansion coefficients of bulk YSZ, LZA and LMA.

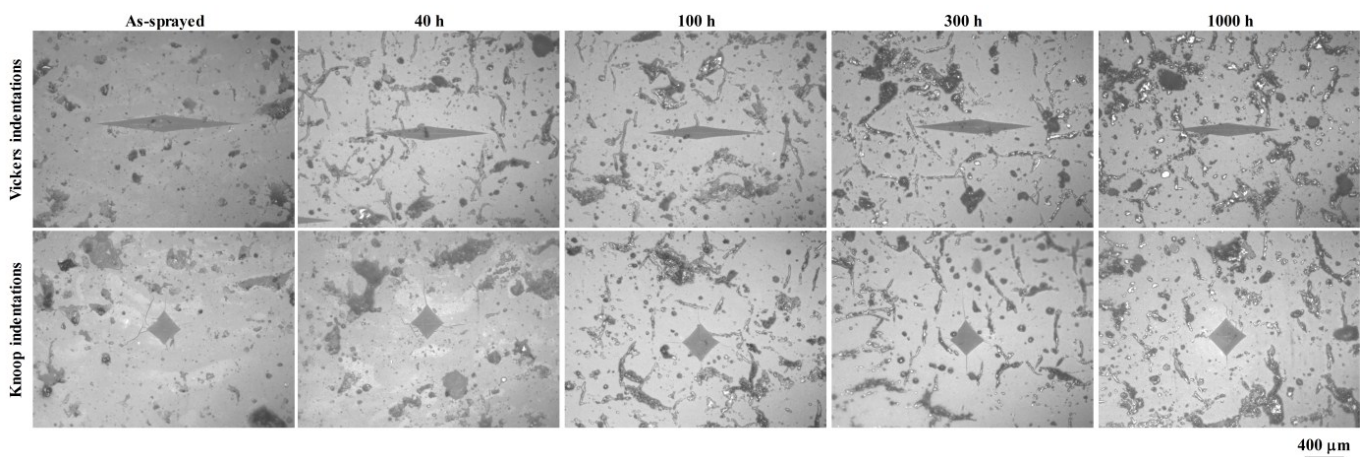

Fig. S2. The representative photos of Vickers and Knoop indentations in the LZA coating: (a) Vickers indentation; (b) Knoop indentation.

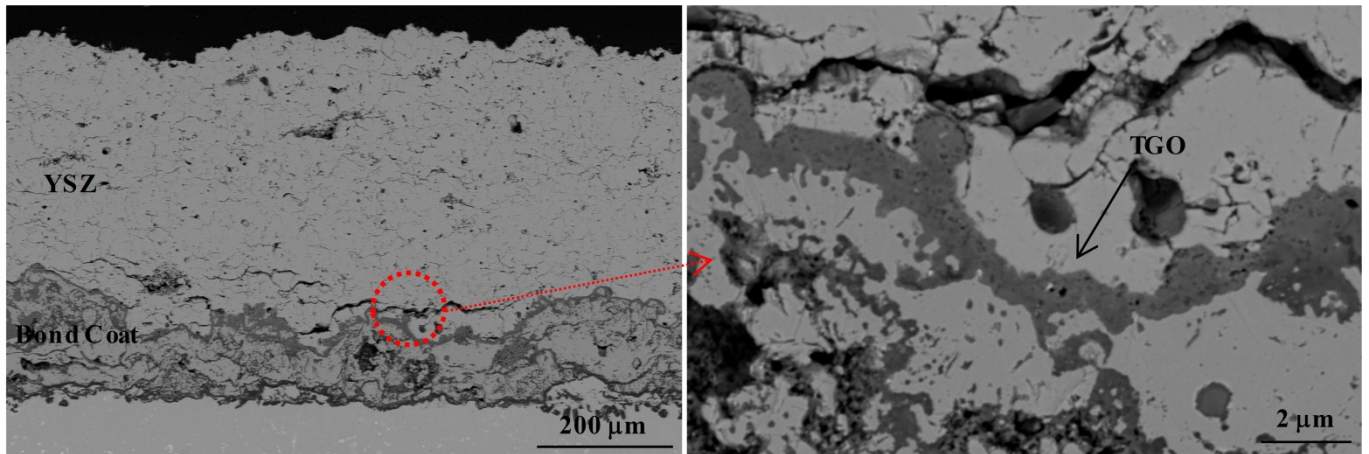

Fig. S3. The SEM images of the failed YSZ TBCs.
